# Supplementary figures and images for: How droplets nucleate and grow on liquids and liquid impregnated surfaces
Source: Royal Society of Chemistry journal article supplement (doi:10.1039/c4sm01424c), 2014-10-21

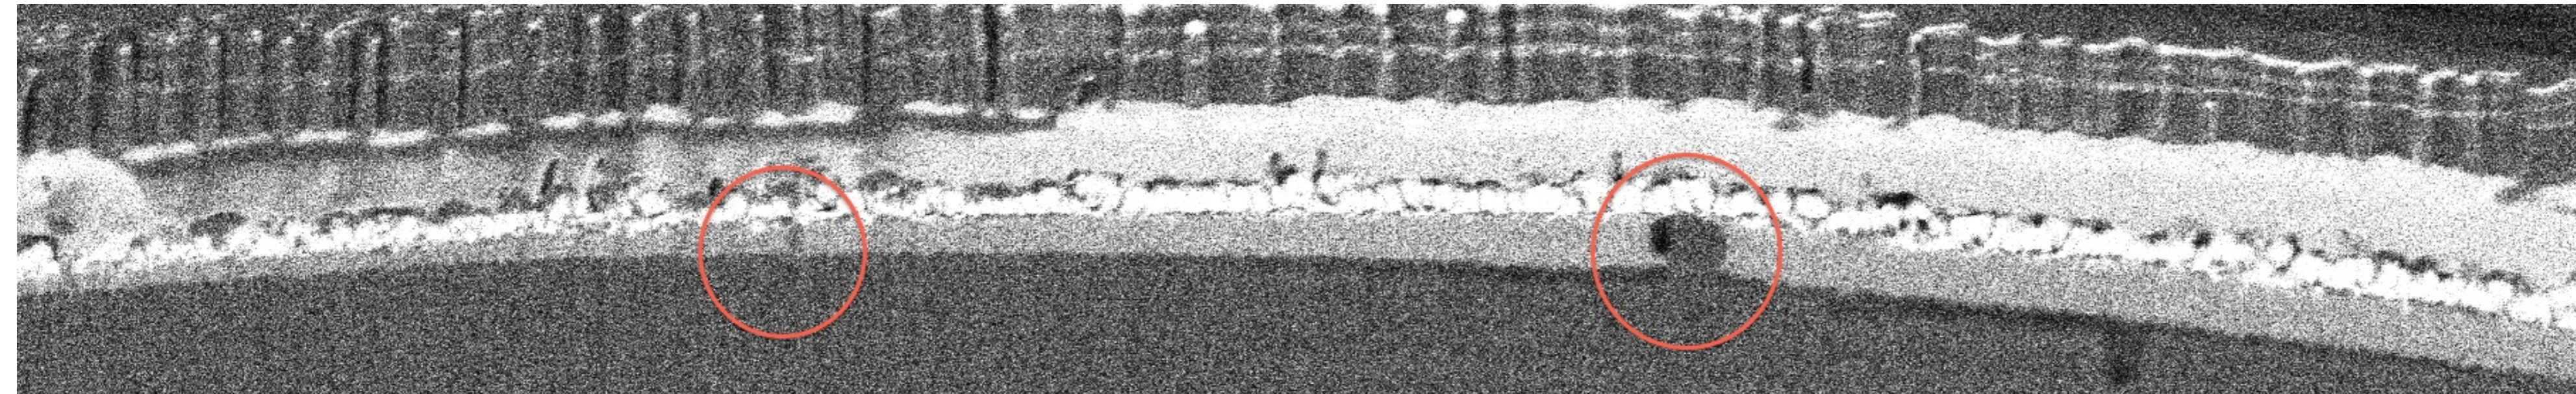

Supplement: c4sm01424c1.pdf [file c4sm01424c1.pdf]
